# Supplementary material
Source: Royal Society of Chemistry journal article supplement (doi:10.1039/d6nj01723a)
Supplement: d6nj01723a1.pdf [file d6nj01723a1.pdf]

## Supporting information

# Simultaneous Promotion of Lattice Oxygen Mechanism and Chloride Resistance *via* Iron Doping in Cobalt Sulfide toward Robust Seawater Splitting

Huijun Zhu<sup>a</sup>, Zekai Zhu<sup>a</sup>, Yuying Meng<sup>\*a,b</sup>, Lei Feng<sup>a</sup>, Bing Du<sup>c</sup>, Wenbiao Zhang<sup>a</sup>,  
Qingsheng Gao<sup>\*a</sup>

*a* College of Chemistry and Materials Science, Jinan University, Guangzhou 510632,  
China

*b* Institute of Advanced Wear & Corrosion Resistant and Functional Materials, Jinan  
University, Guangzhou, 510632, China

*c* College of Materials Science and Engineering, Shenzhen University, 1066 Xueyuan  
Avenue, Shenzhen, 518060, China

Corresponding author: Yuying Meng ([yymeng9169@jnu.edu.cn](mailto:yymeng9169@jnu.edu.cn))

Qingsheng Gao ([tqsgao@jnu.edu.cn](mailto:tqsgao@jnu.edu.cn))

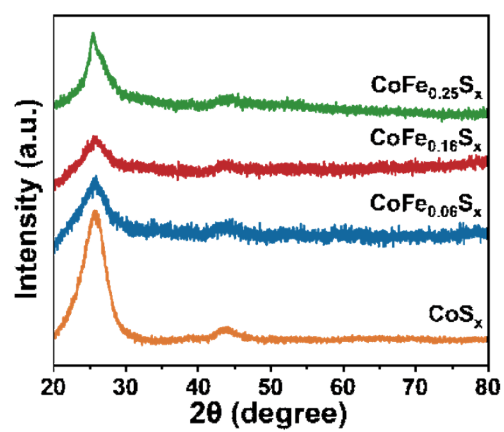

**Figure S1** XRD patterns of  $\text{CoS}_x$ ,  $\text{CoFe}_{0.06}\text{S}_x$ ,  $\text{CoFe}_{0.16}\text{S}_x$ , and  $\text{CoFe}_{0.25}\text{S}_x$ .

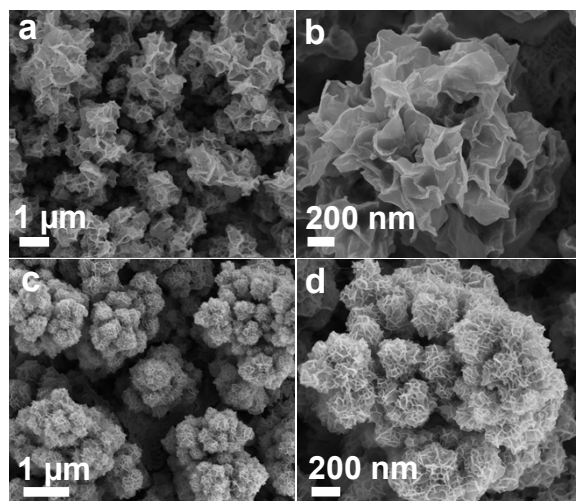

**Figure S2** SEM images of (a,b) CoFe<sub>0.06</sub>S<sub>x</sub> and (c,d) CoFe<sub>0.25</sub>S<sub>x</sub>.

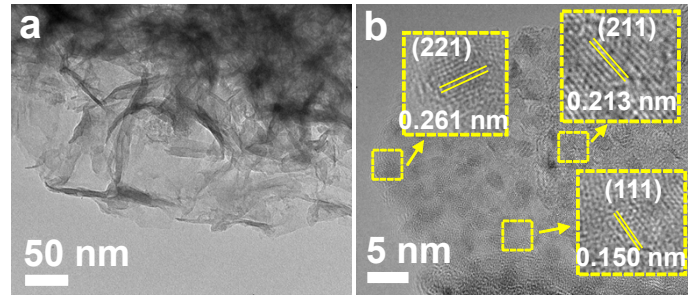

**Figure S3** (a) TEM image of  $\text{CoS}_x$ . (b) HRTEM image of  $\text{CoS}_x$ .

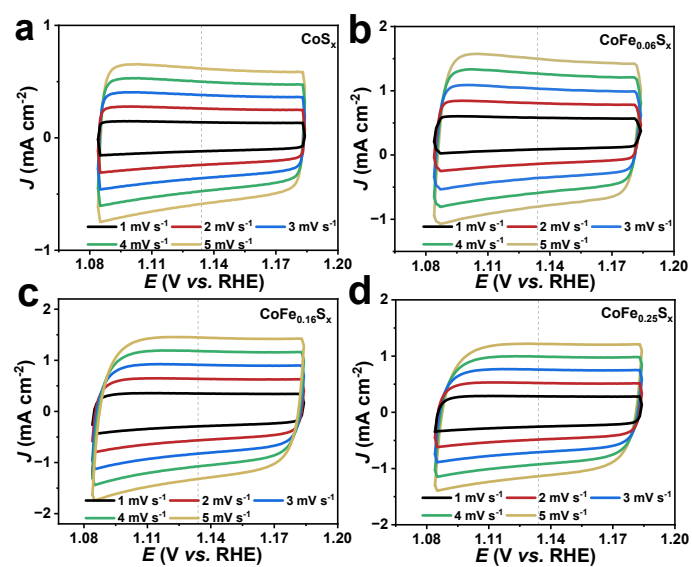

**Figure S4** Cyclic voltammograms at various scan rates of 1, 2, 3, 4, and 5 mV s<sup>-1</sup> for (a) CoS<sub>x</sub>, (b) CoFe<sub>0.06</sub>S<sub>x</sub>, (c) CoFe<sub>0.16</sub>S<sub>x</sub>, and (d) CoFe<sub>0.25</sub>S<sub>x</sub>.

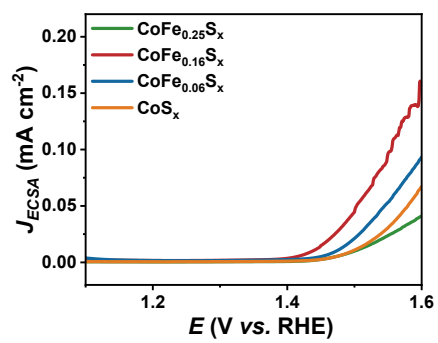

**Figure S5** LSV curves with the current density normalized by ECSA over CoS<sub>x</sub>-based electrodes in 1.0 M KOH solution.

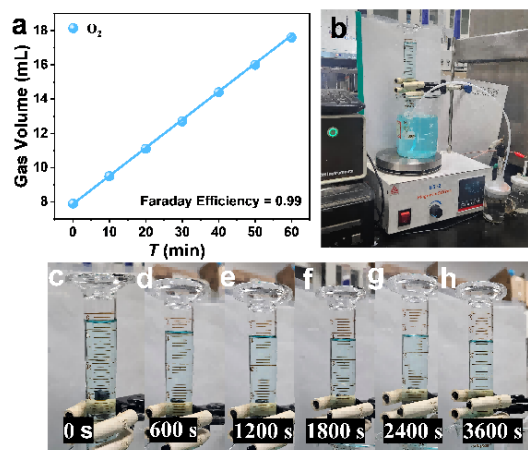

**Figure S6** (a) Measured and calculated volume of O<sub>2</sub> as a function time. (b) Diagram of the Faraday efficiency test device. (c-h) The digital photograph of O<sub>2</sub> volume collected at different time (0 s, 600 s, 1200 s, 1800 s, 2400 s, 3600 s).

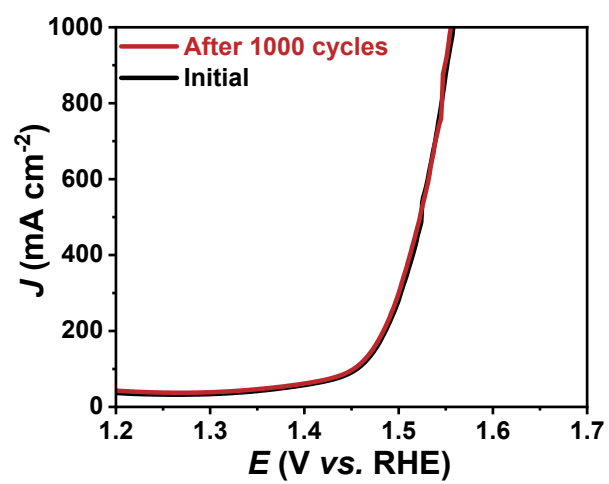

**Figure S7** LSV curves before and after 1000 cycles continues test.

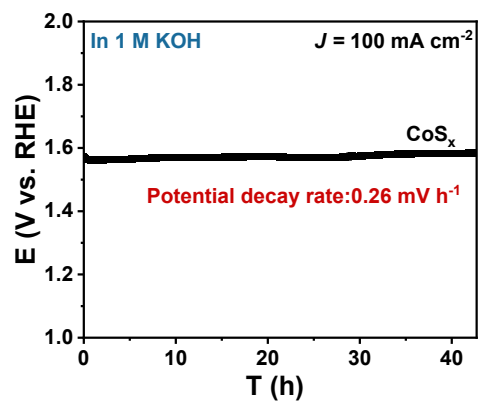

**Figure S8** Chronopotentiometric measurements conducted at 1.0 M KOH under a current density of  $100 \text{ mA cm}^{-2}$ .

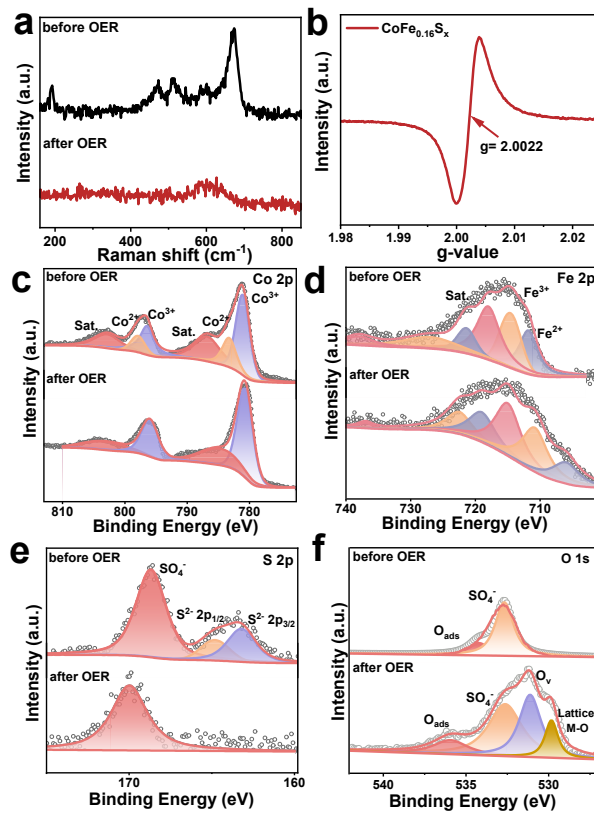

**Figure S9** (a) Raman spectra of  $\text{CoFe}_{0.16}\text{S}_x$  before and after 94 h long-term stability test toward OER at  $100 \text{ mA cm}^{-2}$ . (b) EPR spectrum of  $\text{CoFe}_{0.16}\text{S}_x$  after 1000CV activation in 1 M KOH. High-resolution spectra for (c) Co 2p (d) Fe 2p (e) S 2p and (f) O 1s in  $\text{CoFe}_{0.16}\text{S}_x$  before and after 94 h long-term stability test toward OER at  $100 \text{ mA cm}^{-2}$ .

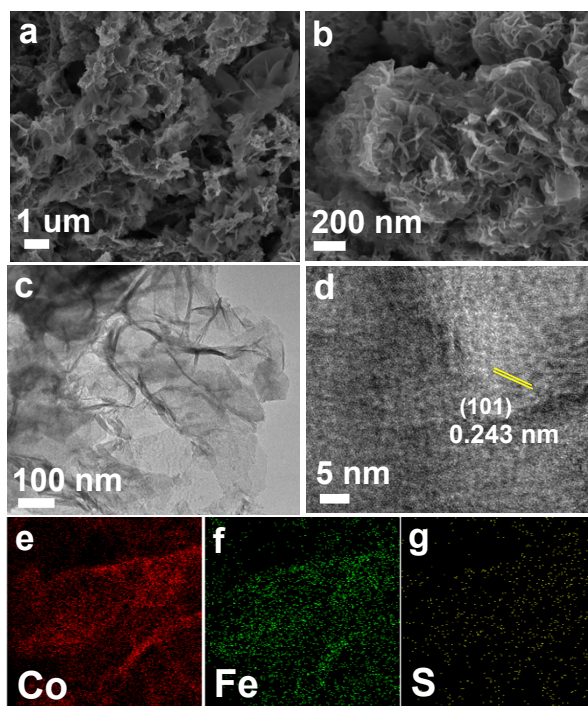

**Figure S10** Morphological information of Fe-CoS<sub>x</sub> after 94 h long-term stability test toward OER at 100 mA cm<sup>-2</sup>. (a,b) SEM and (c,d) TEM. (e-g) EDS elemental mapping images of CoFe<sub>0.16</sub>S<sub>x</sub> after OER.

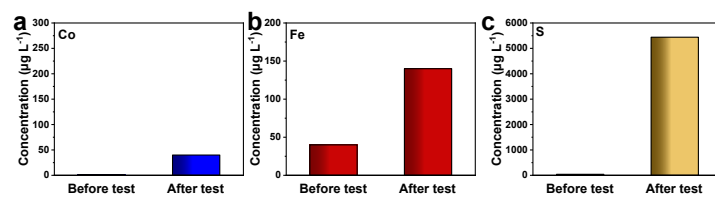

**Figure S11** ICP-MS analysis of the post-reaction electrolyte. (a) Co, (b) Fe, and (c) S.

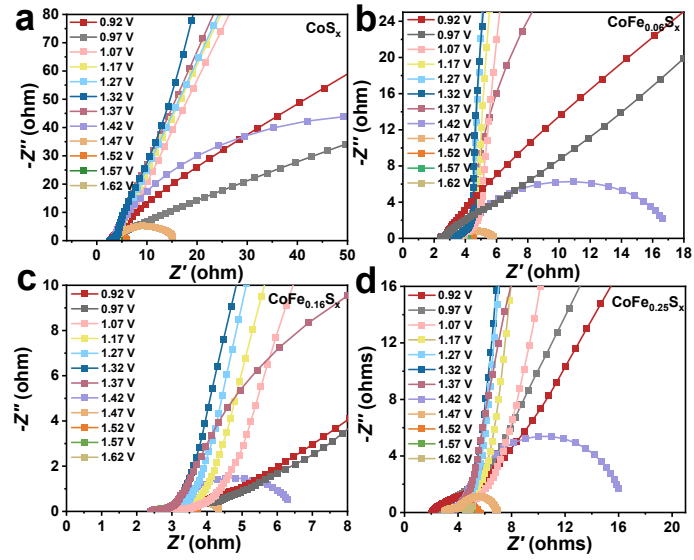

**Figure S12** EIS plots at different potentials of (a)  $\text{CoS}_x$ , (b)  $\text{CoFe}_{0.06}\text{S}_x$ , (c)  $\text{CoFe}_{0.16}\text{S}_x$ , and (d)  $\text{CoFe}_{0.25}\text{S}_x$ .

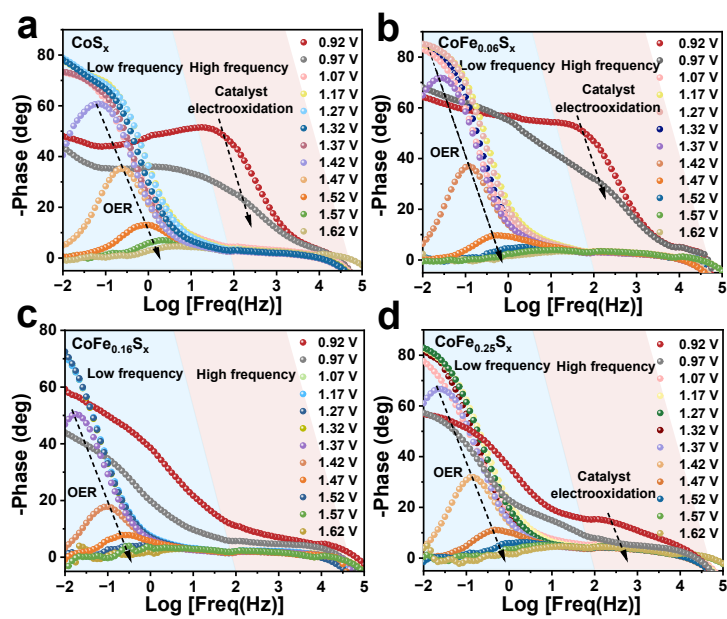

**Figure S13** *In-situ* Bode phase plots under different potentials (from 0.92 to 1.62 V) for (a)  $\text{CoS}_x$ , (b)  $\text{CoFe}_{0.06}\text{S}_x$ , (c)  $\text{CoFe}_{0.16}\text{S}_x$ , and (d)  $\text{CoFe}_{0.25}\text{S}_x$ .

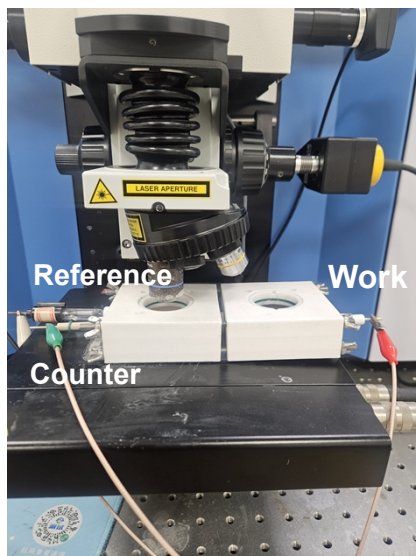

**Figure S14** Images of *in situ* Raman setup.

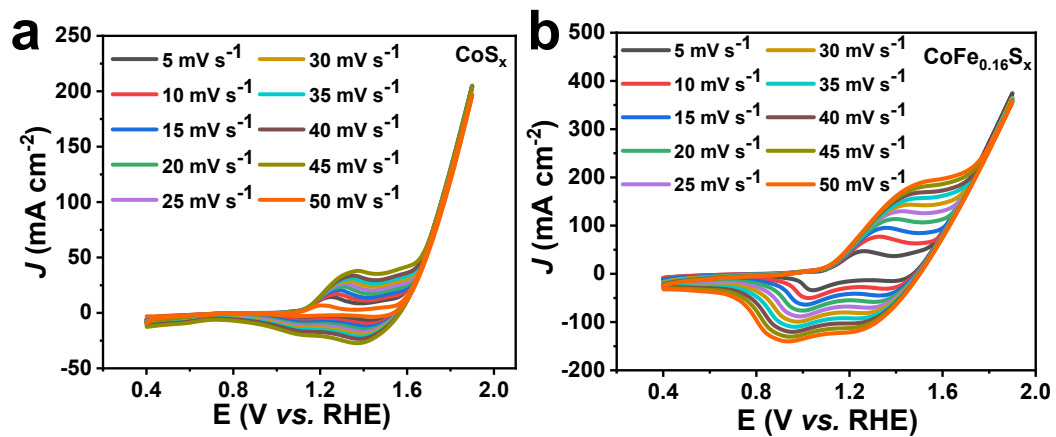

**Figure S15** CVs of (a) CoS<sub>x</sub> and (b) CoFe<sub>0.16</sub>S<sub>x</sub> at different scan rates increasing from 5 to 50 mV s<sup>-1</sup> in 1.0 M KOH.

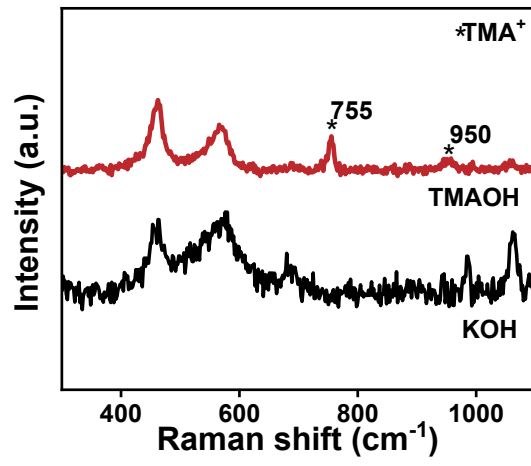

**Figure S16** Raman spectra of CoFe<sub>0.16</sub>S<sub>x</sub> after test in TMAOH.

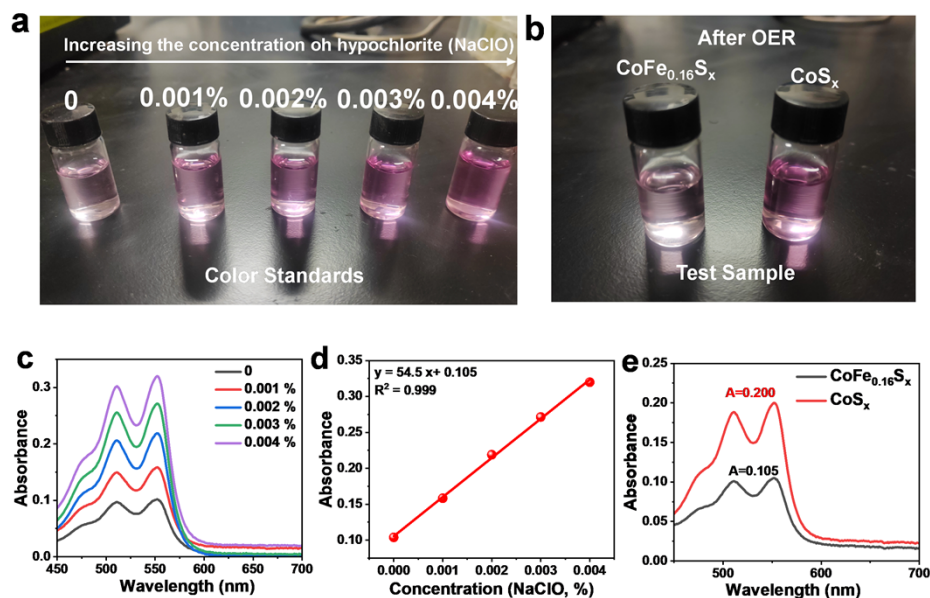

**Figure S17** (a) The digital photograph of the electrolyte hypochlorite detection result for 1 M KOH + 0.5 M NaCl with different NaClO contents. (b) After 124 h electrolysis for  $\text{CoFe}_{0.16}\text{S}_x$  and  $\text{CoS}_x$  at  $100 \text{ mA cm}^{-2}$  in 1 M KOH + 0.5 M NaCl. (c) UV-vis absorption spectra of  $\text{ClO}^-$  with different concentrations. (d) Calibration curve used for calculating  $\text{ClO}^-$  concentrations of the electrolyte and (f) UV-vis absorption spectrum of the electrolyte after 124 h electrolysis for  $\text{CoFe}_{0.16}\text{S}_x$  and  $\text{CoS}_x$  at  $100 \text{ mA cm}^{-2}$  in 1 M KOH + 0.5 M NaCl.
